CORRECTION

# Correction: People making deontological judgments in the Trapdoor dilemma are perceived to be more prosocial in economic games than they actually are

Valerio Capraro, Jonathan Sippel, Bonan Zhao, Levin Hornischer, Morgan Savary, Zoi Terzopoulou, Pierre Faucher, Simone F. Griffioen

In Fig 1, the columns that depict the average amount transferred by Player A to Player B as a function of whether Player B is a Trapdoor-deontologist or a Trapdoor-consequentialist report incorrect values. The average amounts should be 57.7% and 69.2%. Please see the correct Fig 1 here.

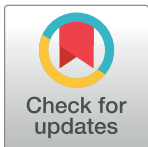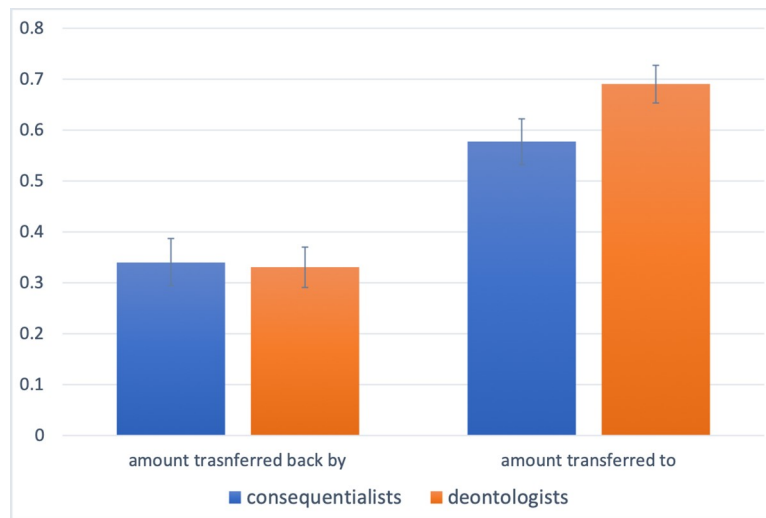

**Fig 1. Deontologists are perceived to be more trustworthy than consequentialists, but they are actually not.** The pair of columns on the left-hand side reports the average amount transferred back by Player B to Player A in the Trust Game as a function of whether Player B is a Trapdoor-deontologist or a Trapdoor-consequentialist. The pair of columns on the right-hand side reports the average amount transferred by Player A to Player B, as a function of whether Player B is a Trapdoor-deontologist or a Trapdoor-consequentialist. Error bars represent the standard error of the mean.

<https://doi.org/10.1371/journal.pone.0225850.g001>

## Reference

1. Capraro V, Sippel J, Zhao B, Hornischer L, Savary M, Terzopoulou Z, et al. (2018) People making deontological judgments in the Trapdoor dilemma are perceived to be more prosocial in economic games than they actually are. PLoS ONE 13(10): e0205066. <https://doi.org/10.1371/journal.pone.0205066> PMID: 30307977

## OPEN ACCESS

**Citation:** Capraro V, Sippel J, Zhao B, Hornischer L, Savary M, Terzopoulou Z, et al. (2019) Correction: People making deontological judgments in the Trapdoor dilemma are perceived to be more prosocial in economic games than they actually are. PLoS ONE 14(11): e0225850. <https://doi.org/10.1371/journal.pone.0225850>

**Published:** November 21, 2019

**Copyright:** © 2019 Capraro et al. This is an open access article distributed under the terms of the [Creative Commons Attribution License](https://creativecommons.org/licenses/by/4.0/), which permits unrestricted use, distribution, and reproduction in any medium, provided the original author and source are credited.
